# Supplementary material
Source: MDPI journal article supplement (https://www.mdpi.com/2073-4433/11/3/286)
Supplement: s1 [file s1]

## Supplementary Materials

### Supplementary figures:

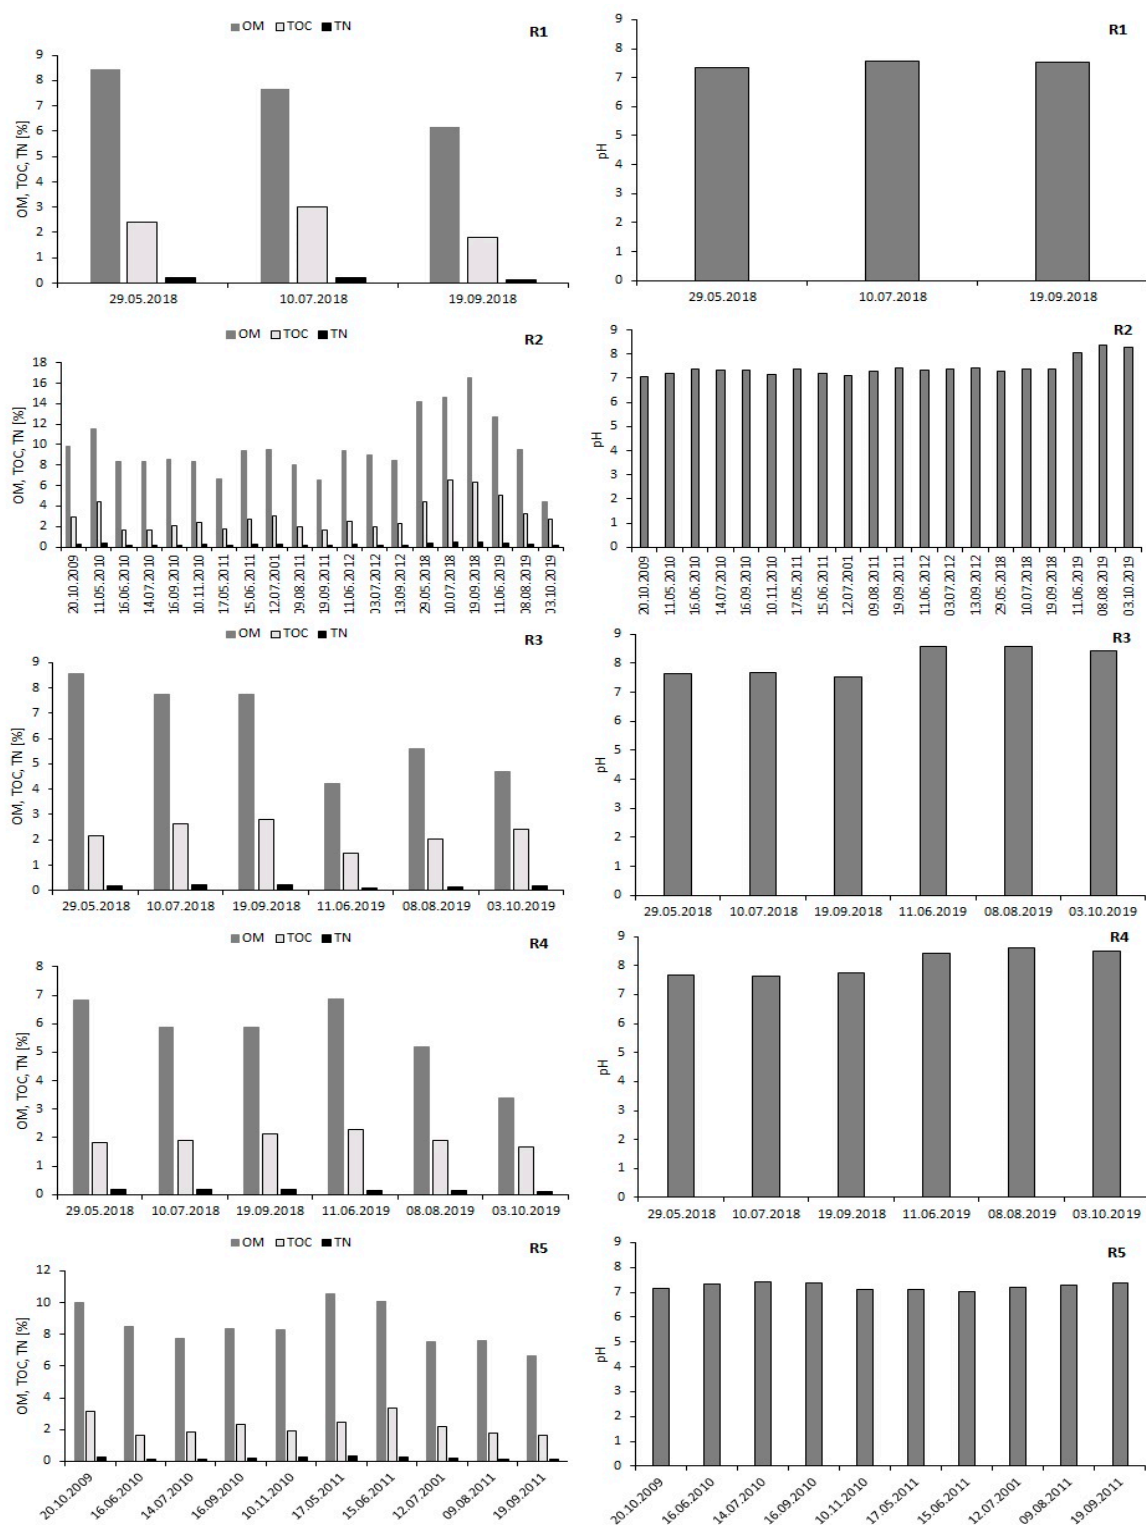

**Figure S1.** Organic matter (OM), total organic carbon (TOC), total nitrogen (TN) contents and pH in studied sediments in Rzeszów Reservoir.

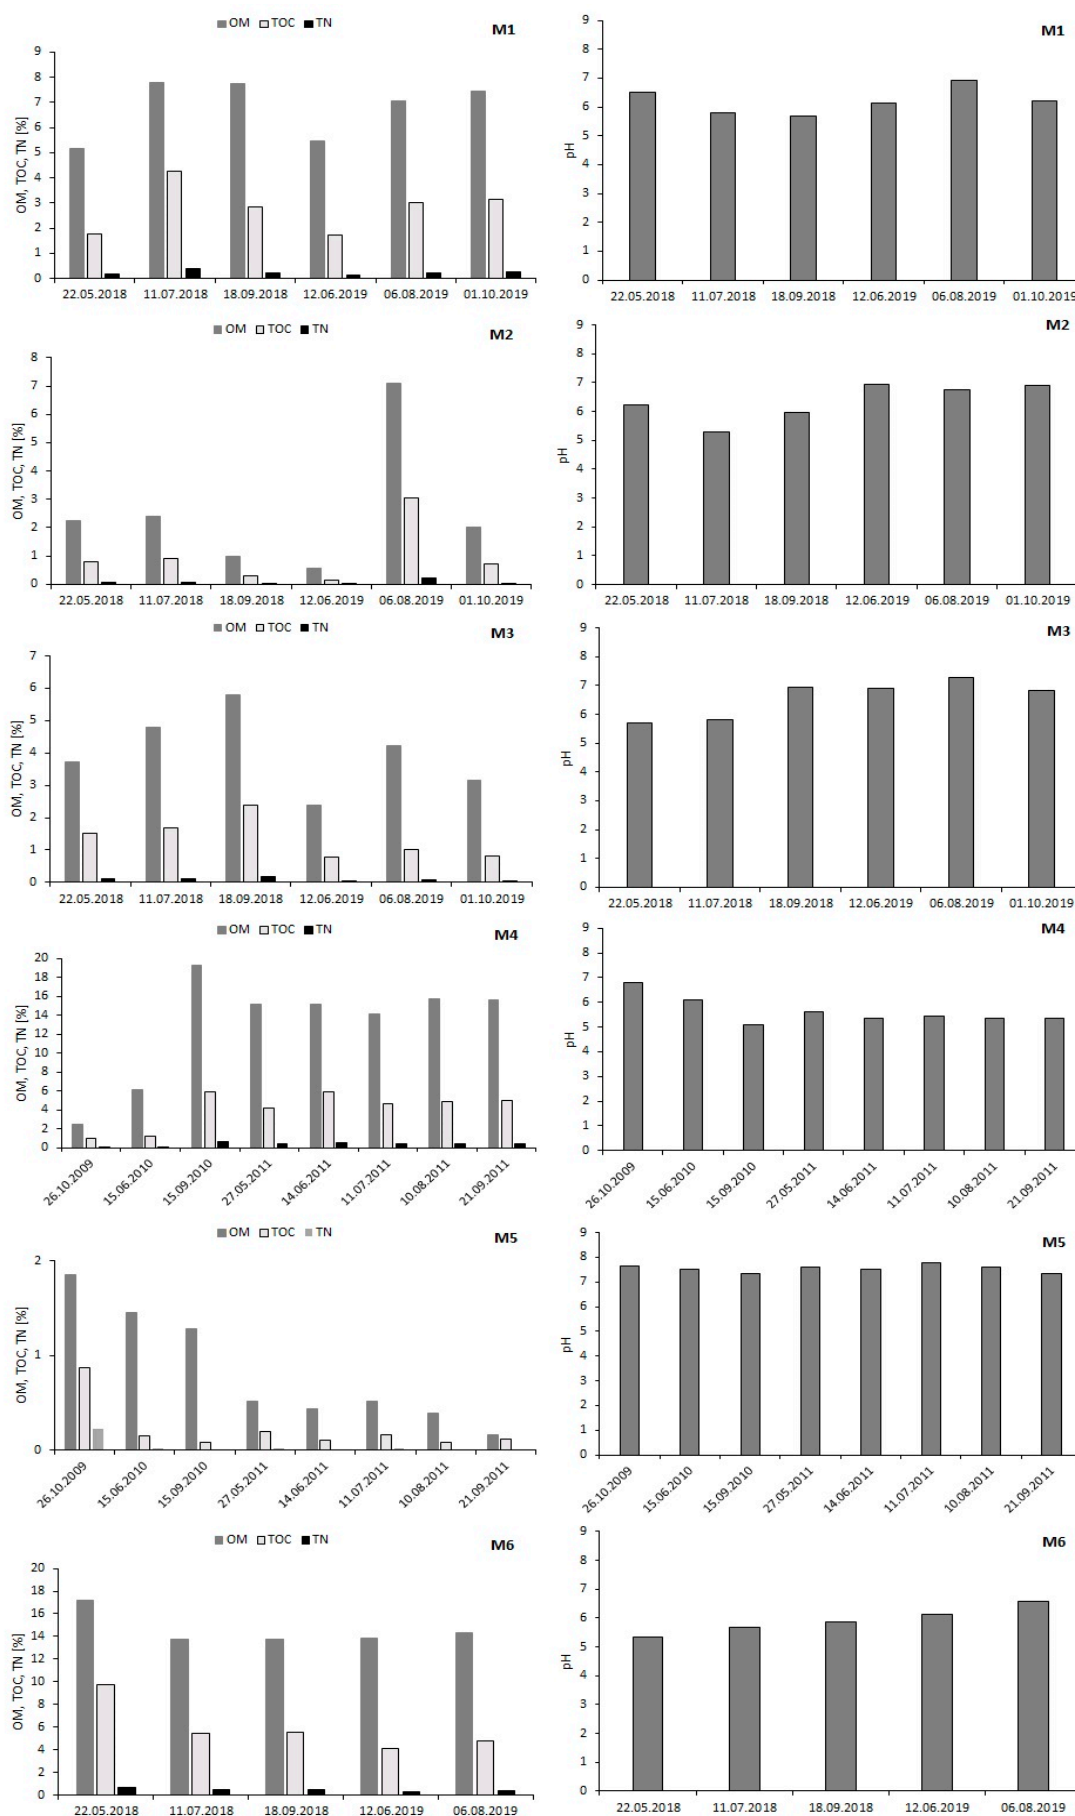

Figure S2. Organic matter (OM), total organic carbon (TOC), total nitrogen (TN) contents and pH in studied sediments in Maziarnia Reservoir.

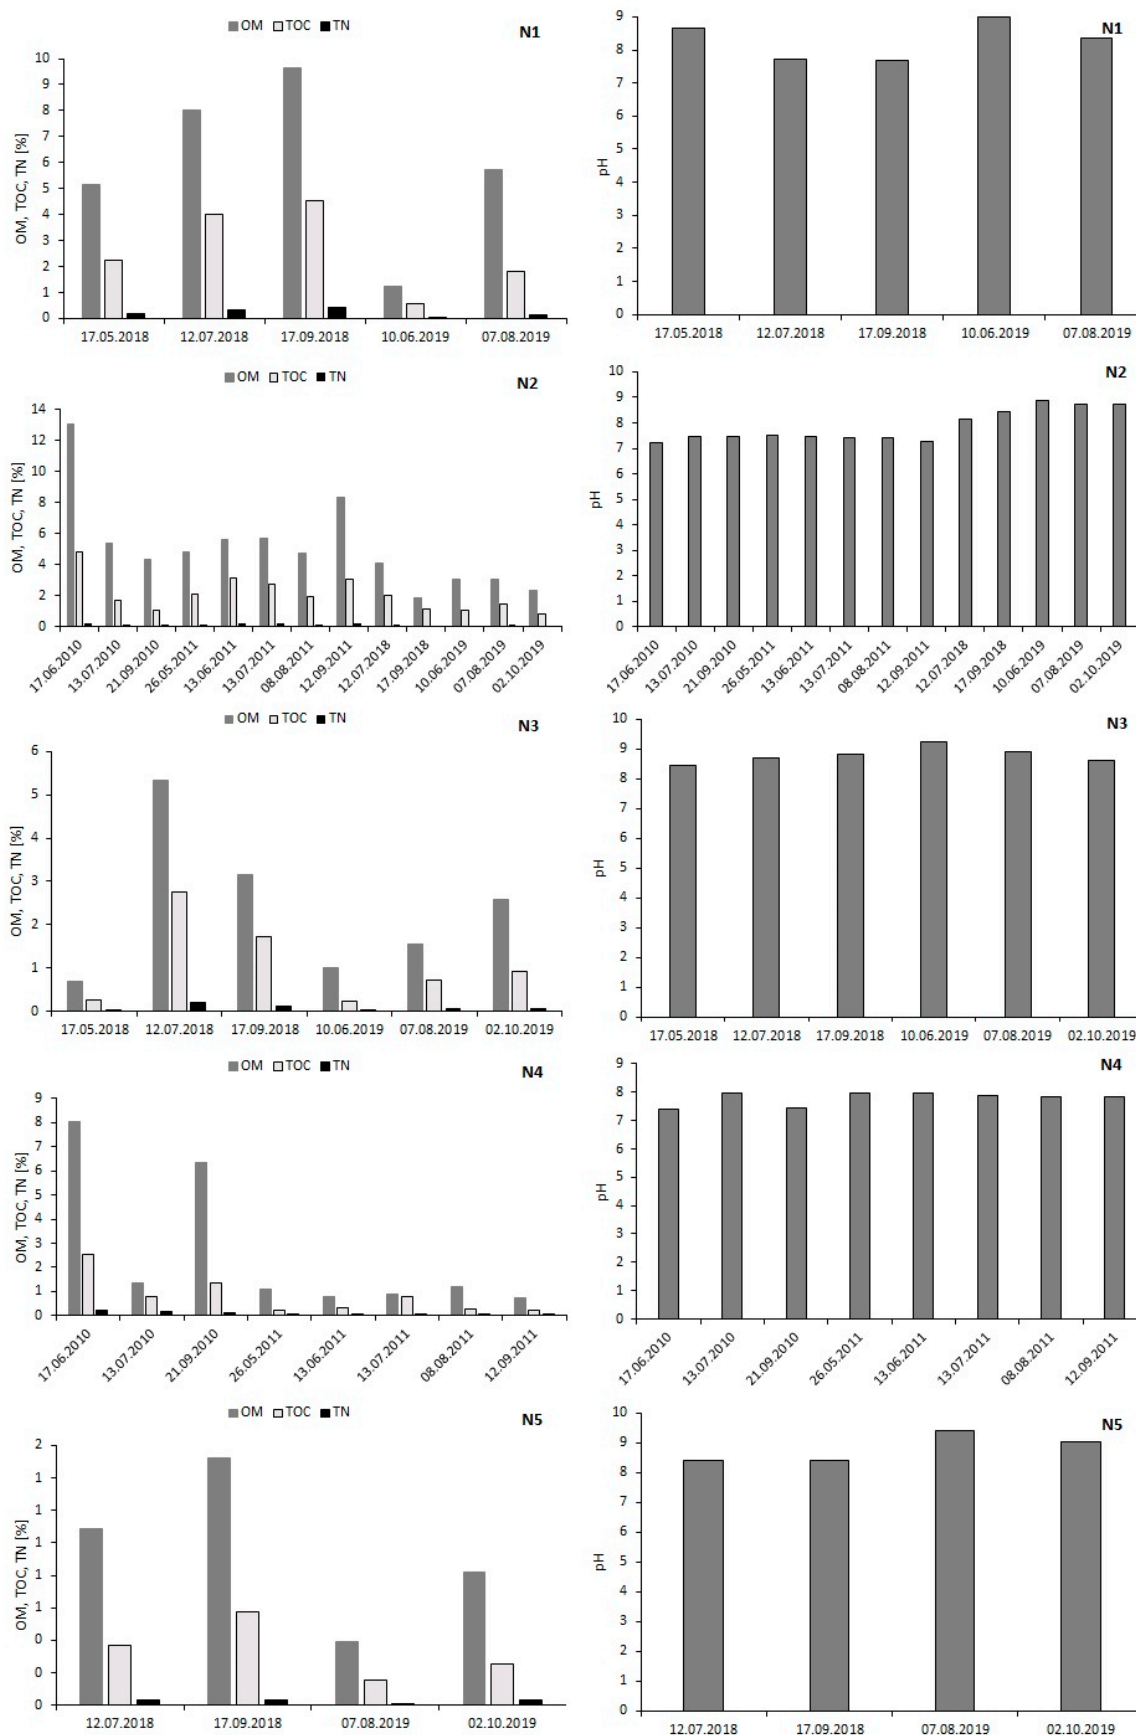

Figure S3. Organic matter (OM), total organic carbon (TOC), total nitrogen (TN) contents and pH in studied sediments in Nielisz Reservoir.
